# Supplementary material for: Colloidal spherical stibnite particles via high-temperature metallo-organic synthesis
Source: Royal Society of Chemistry journal article supplement (doi:10.1039/d4na00020j), 2024-01-01
Supplement: d4na00020j1.pdf [file d4na00020j1.pdf]

Electronic supplementary information (ESI)

## **Colloidal spherical stibnite particles via high-temperature metallo-organic synthesis**

Maximilian Joschko<sup>a</sup>, Christina Malsi<sup>a</sup>, John Rapier<sup>a</sup>, Paolo Scharmann<sup>a</sup>, Sören Selve<sup>b</sup>, and Christina Graf<sup>\*a</sup>

*<sup>a</sup>Hochschule Darmstadt - University of Applied Sciences, Fachbereich Chemie- und Biotechnologie, Stephanstr. 7, D-64295 Darmstadt, Germany*

*<sup>b</sup>Technische Universität Berlin, Zentraleinrichtung Elektronenmikroskopie (ZELMI), Straße des 17. Juni 135, D-10623 Berlin, Germany*

*\*Corresponding author | Prof. Dr. Christina Graf | [christina.graf@h-da.de](mailto:christina.graf@h-da.de)*

### Particle purification

The as-received particles were purified by subsequent centrifugation and redispersing in different solvents. The solvents used during the purification process were isopropyl alcohol (IPA), water, and dimethyl formamide (DMF).

First, the reaction mixture was divided into two 50 mL centrifuge tubes of 12.5 mL each and was made up to 40 mL with IPA. The tubes were sonicated for 5 min using an ultrasonic bath for 5 min. The particles were then centrifuged at 1000 rcf for 20 min, and the supernatant was removed. Subsequently, the particles were redispersed in a water/IPA mixture using an ultrasonic processor (UP50H, Hielscher; 1 cycle, 100 % amplitude, tip: MS3). The following purification steps were performed analogously and are summarized in Table S1. Finally, the particles were redispersed in 5 mL H<sub>2</sub>O.

**Table S1** Particle purification steps 2-7.

| <i>Step</i> | <i>Solvent</i>                      | <i>Ultrasonic treatment (min)</i> | <i>Speed (centrifuge) (rcf)</i> | <i>Duration (centrifuge) (min)</i> |
|-------------|-------------------------------------|-----------------------------------|---------------------------------|------------------------------------|
| <b>2</b>    | 20 mL H <sub>2</sub> O<br>20 mL IPA | 20                                | 1500                            | 20                                 |
| <b>3</b>    | 20 mL H <sub>2</sub> O<br>20 mL IPA | 20                                | 1500                            | 20                                 |
| <b>4</b>    | 40 mL DMF                           | 20                                | 1500                            | 20                                 |
| <b>5</b>    | 40 mL DMF                           | 20                                | 1500                            | 20                                 |
| <b>6</b>    | 20 mL H <sub>2</sub> O<br>20 mL IPA | 20                                | 1500                            | 20                                 |
| <b>7</b>    | 40 mL H <sub>2</sub> O              | 10                                | 1500                            | 20                                 |

Additional measurement data:

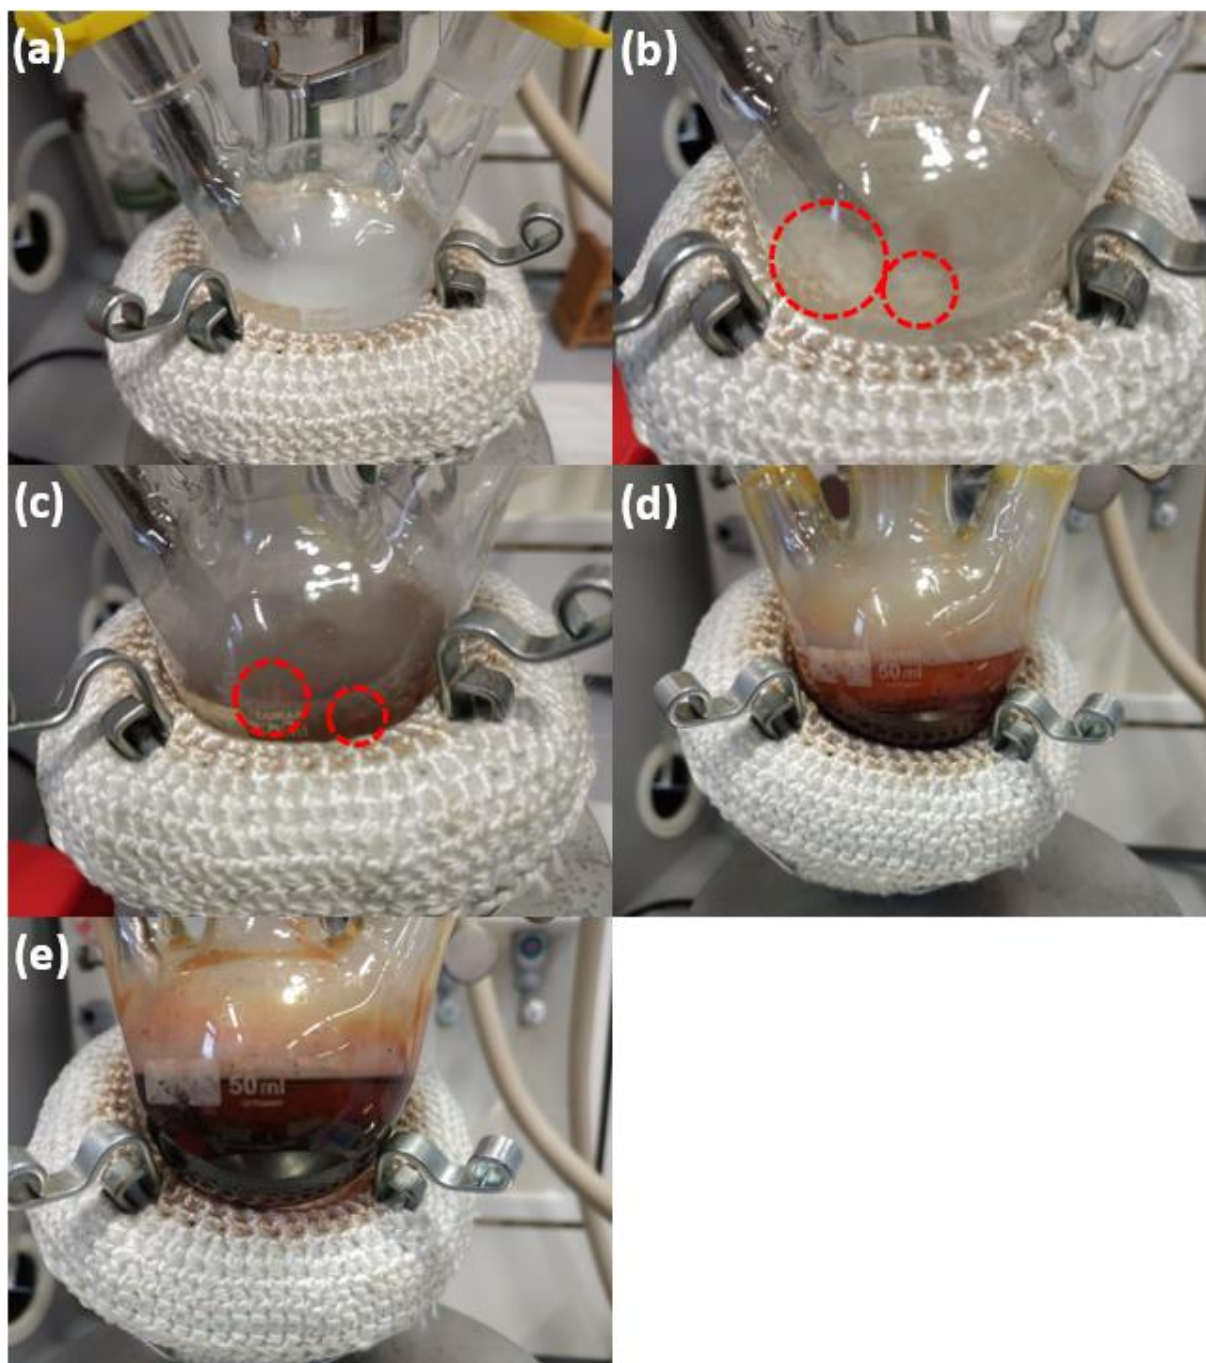

**Fig. S1** Photographs of the reaction mixture at different reaction stages: (a) dispersed precursors at ambient temperature (P0), (b) reaction at 140 °C (PI), (c) reaction at 170 °C (PII), (d) reaction at 200 °C (PIII), and (e) reaction at 240 °C (PIV). The red dotted circles indicate flocculated intermediate.

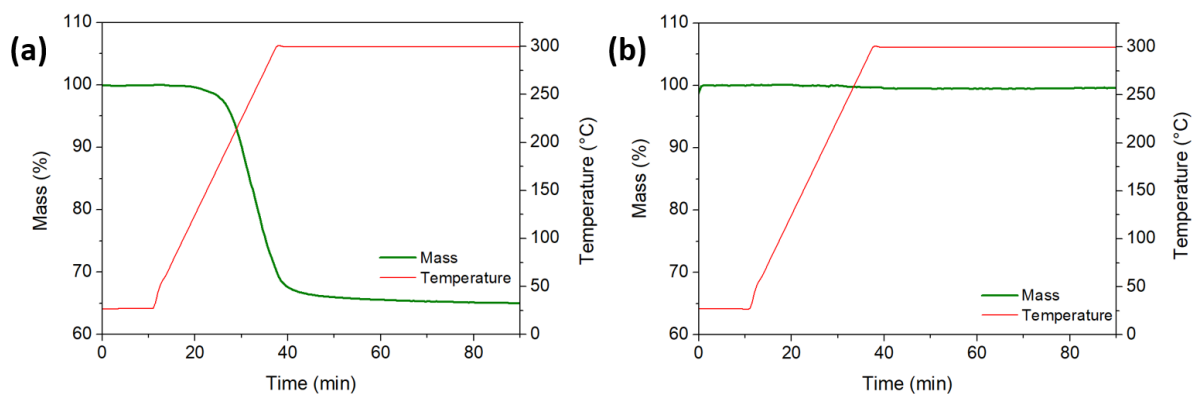

**Fig. S2** TGA graphs showing the changes in mass for a given temperature profile of (a) a sample with matrix around the nanoparticles and (b) a purified sample. The small positive drift in (b) is most likely due to the instrument itself.

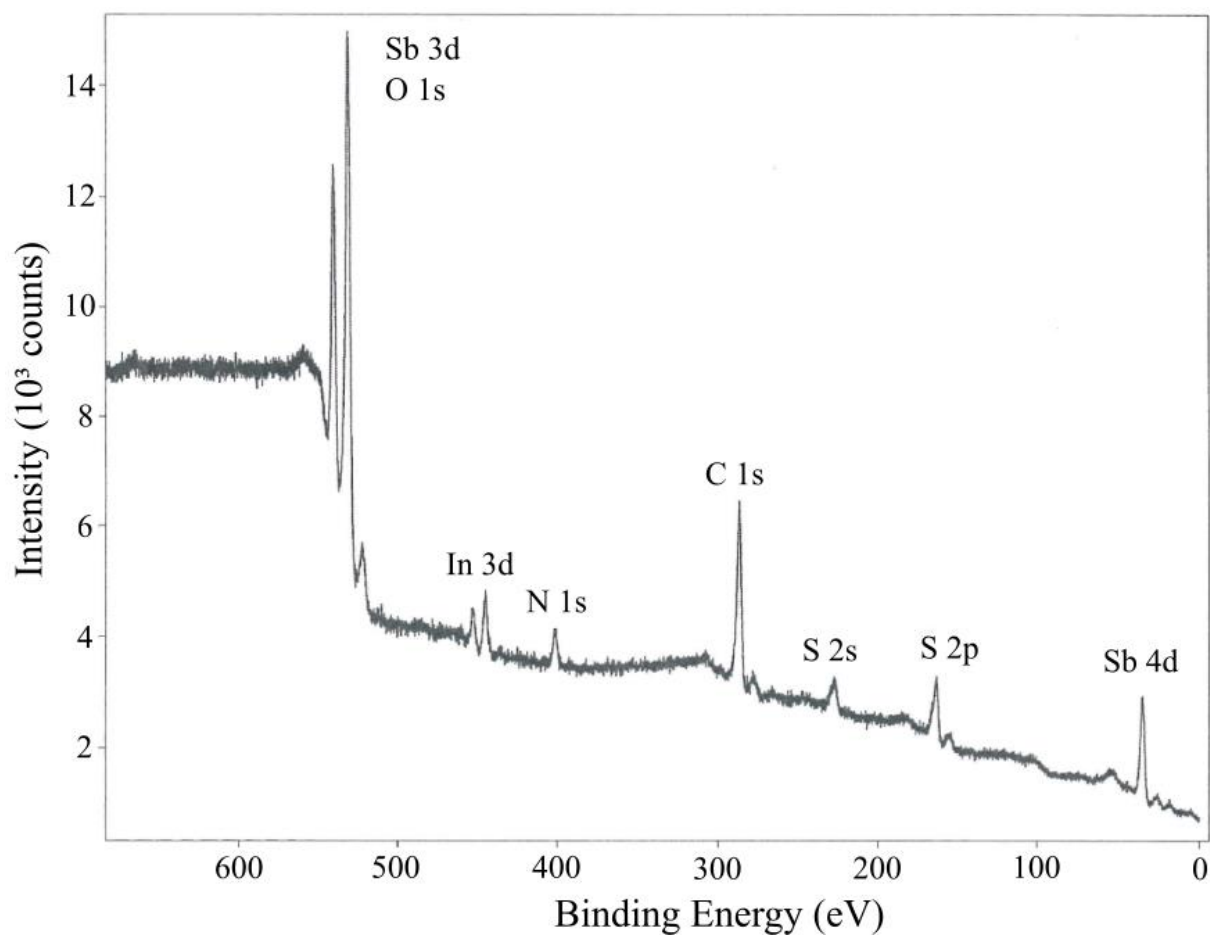

**Fig. S3** XPS data of the purified final sample of  $\text{Sb}_2\text{S}_3$  particles. The In 3d peak is found due to the indium foil in which the sample was wrapped.

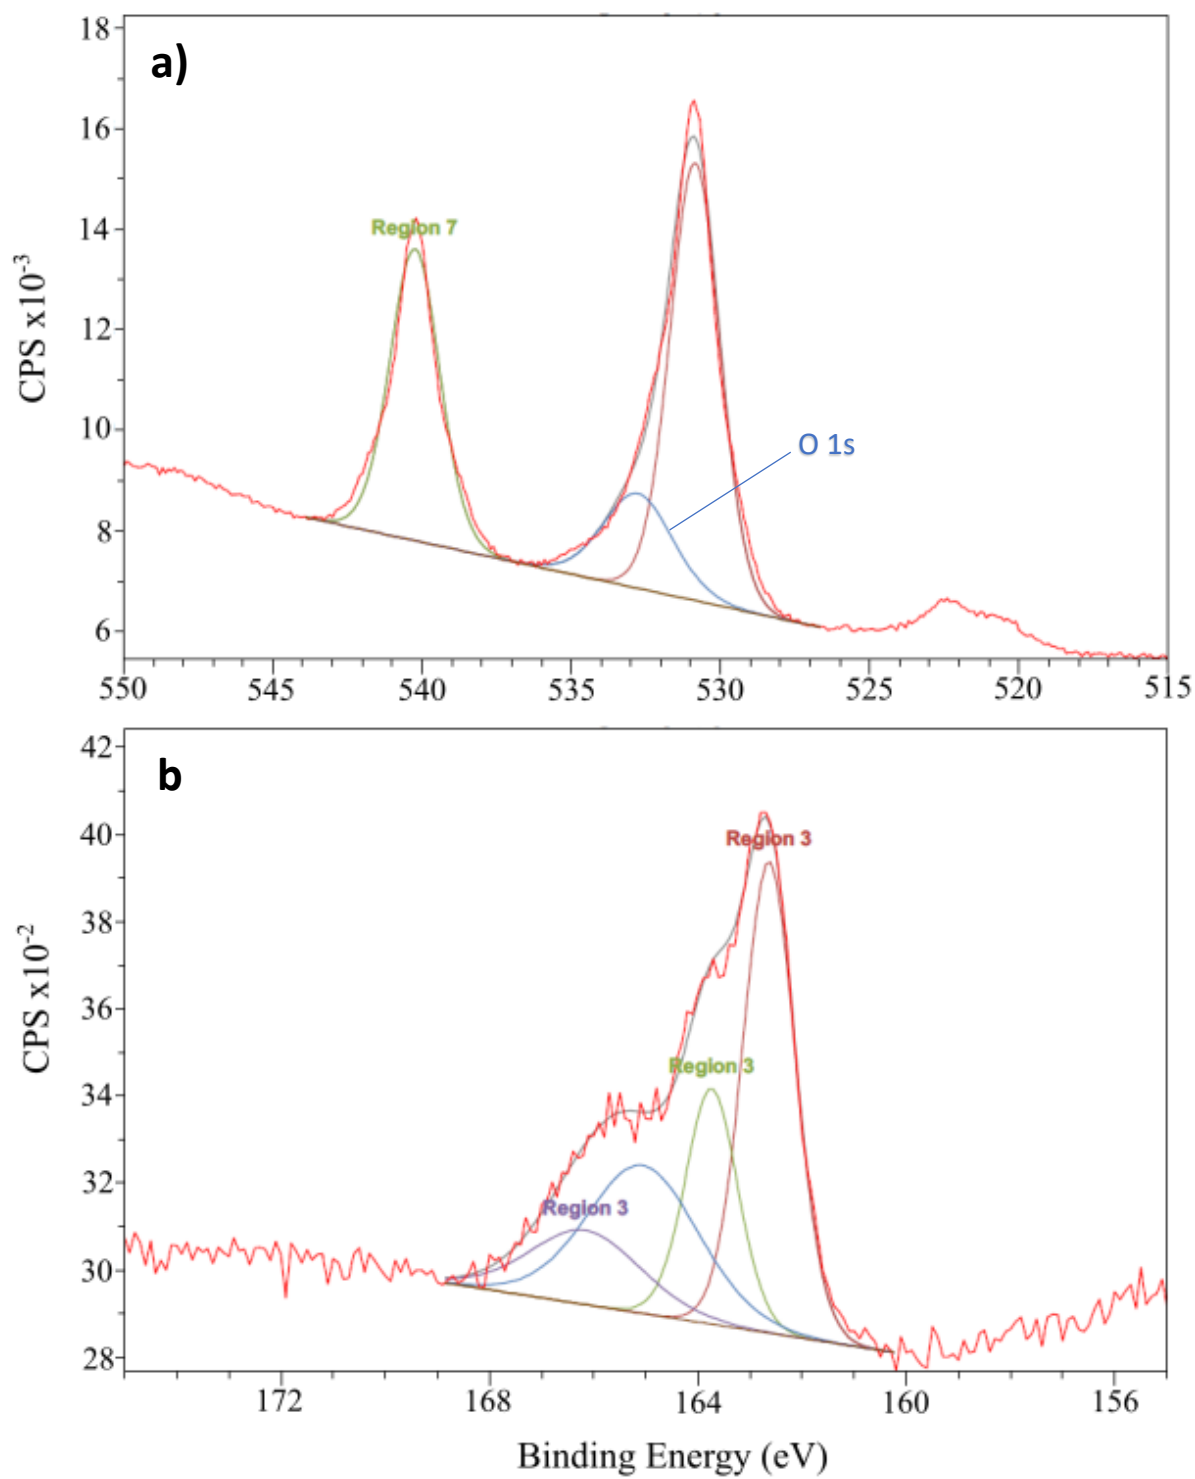

**Fig. S4** Detailed XPS analysis of Sb 3d/O 1s (a) and S 2p (b) in the purified final sample.

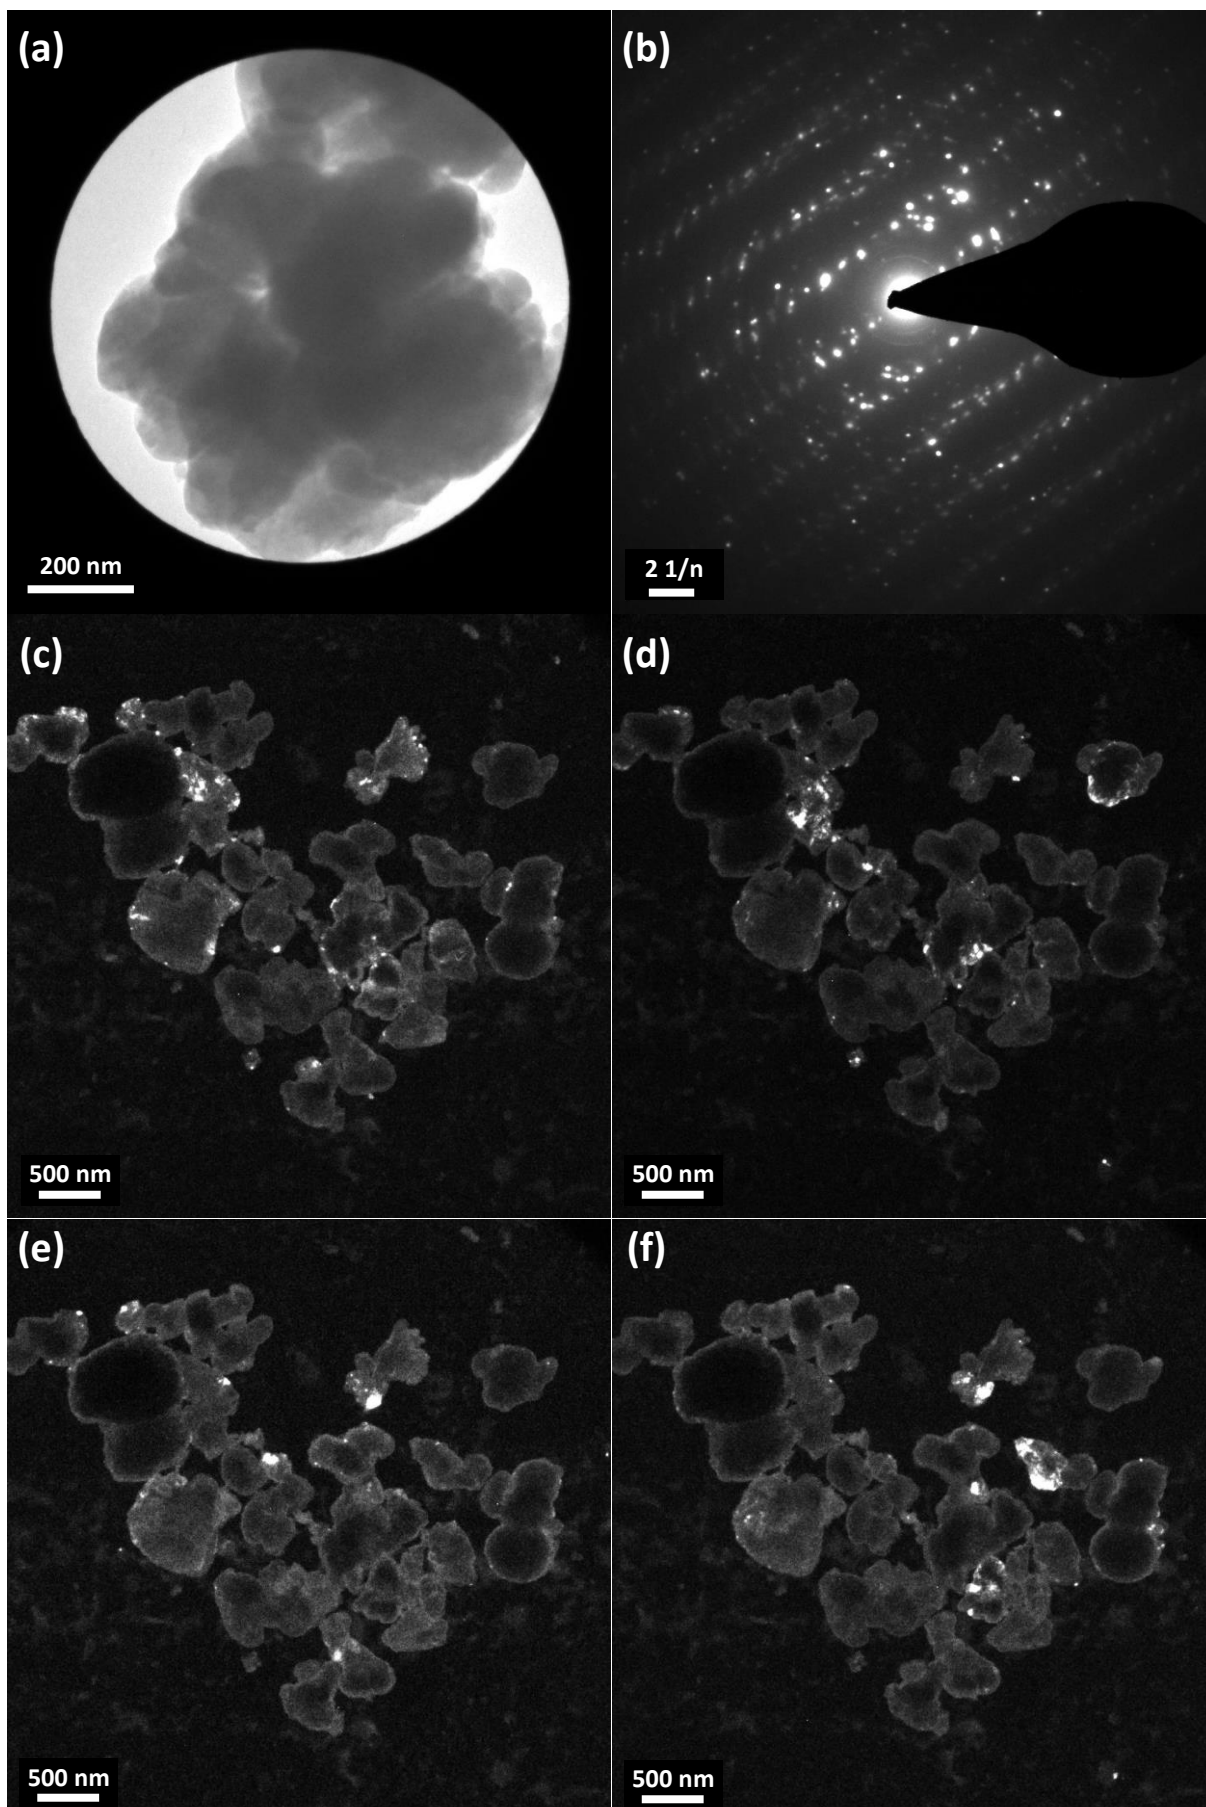

**Fig. S5** (a) TEM image of a particle with (b) the corresponding SAED pattern, and (c) to (f) series of dark-field images of several particles showing different crystal planes in different observation planes.

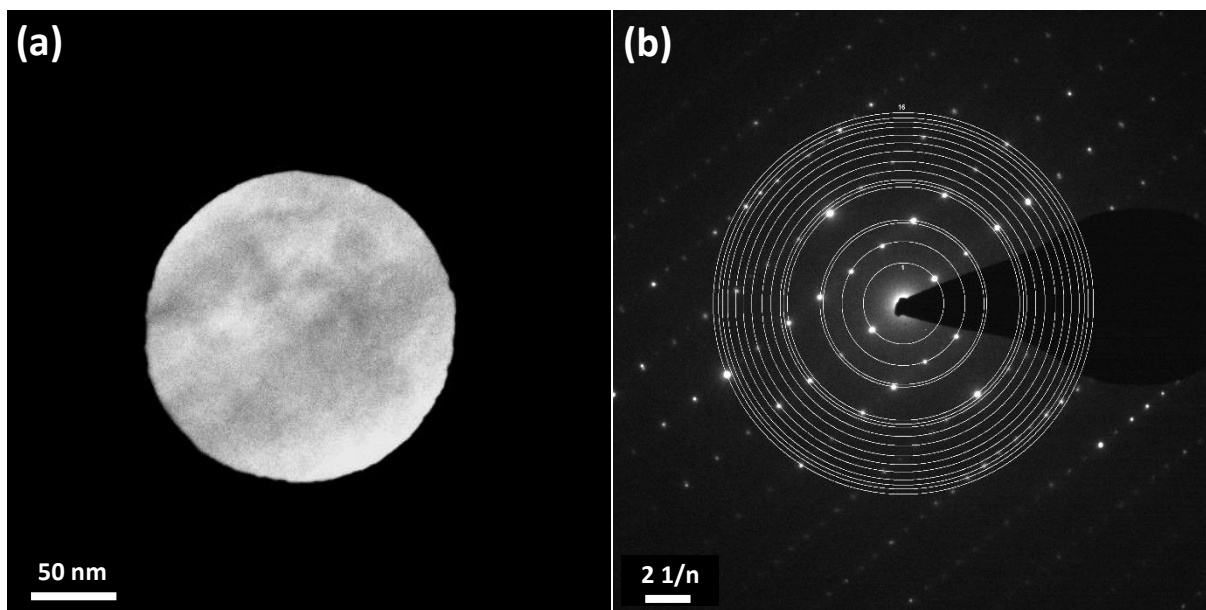

**Fig. S6** (a) HRTEM image of a section of a stibnite particle and (b) the corresponding SAED image with analysis of the reflexes.

**Table S2** Evaluation data taken from the SAED analysis: the diameter of the SAED rings  $D$ , the calculated interplanar spacing  $d$  as well as its reference data  $d_{ref}$ , and the corresponding  $hkl$  indices.

| <i>Reflex</i> | $D$ (1/nm) | $d$ (Å) $\pm 0.05$ Å | $d_{ref}$ (Å) <sup>a</sup> | $hkl$ |
|---------------|------------|----------------------|----------------------------|-------|
| 1             | 3.5704     | 5.602                | 5.625                      | 200   |
| 2             | 5.4595     | 3.663                | 3.631                      | 101   |
| 3             | 7.1219     | 2.808                | 2.765                      | 221   |
| 4             | 7.3738     | 2.712                | 2.725                      | 410   |
| 5             | 10.2704    | 1.947                | 1.947                      | 341   |
| 6             | 10.6230    | 1.883                | 1.886                      | 060   |
| 7             | 10.9001    | 1.835                | 1.842                      | 251   |
| 8             | 11.7061    | 1.709                | 1.693                      | 061   |
| 9             | 12.5121    | 1.598                | 1.600                      | 541   |
| 10            | 13.4189    | 1.490                | 1.484                      | 370   |
| 11            | 14.1745    | 1.411                | 1.414                      | 522   |
| 12            | 14.8294    | 1.349                | 1.352                      | 561   |
| 13            | 15.5347    | 1.287                | 1.292                      | 281   |
| 14            | 15.9881    | 1.251                | 1.245                      | 831   |
| 15            | 16.3407    | 1.224                | 1.225                      | 712   |
| 16            | 16.7941    | 1.191                | 1.200                      | 481   |

<sup>a</sup>References are taken from JCPDS card 42-1393



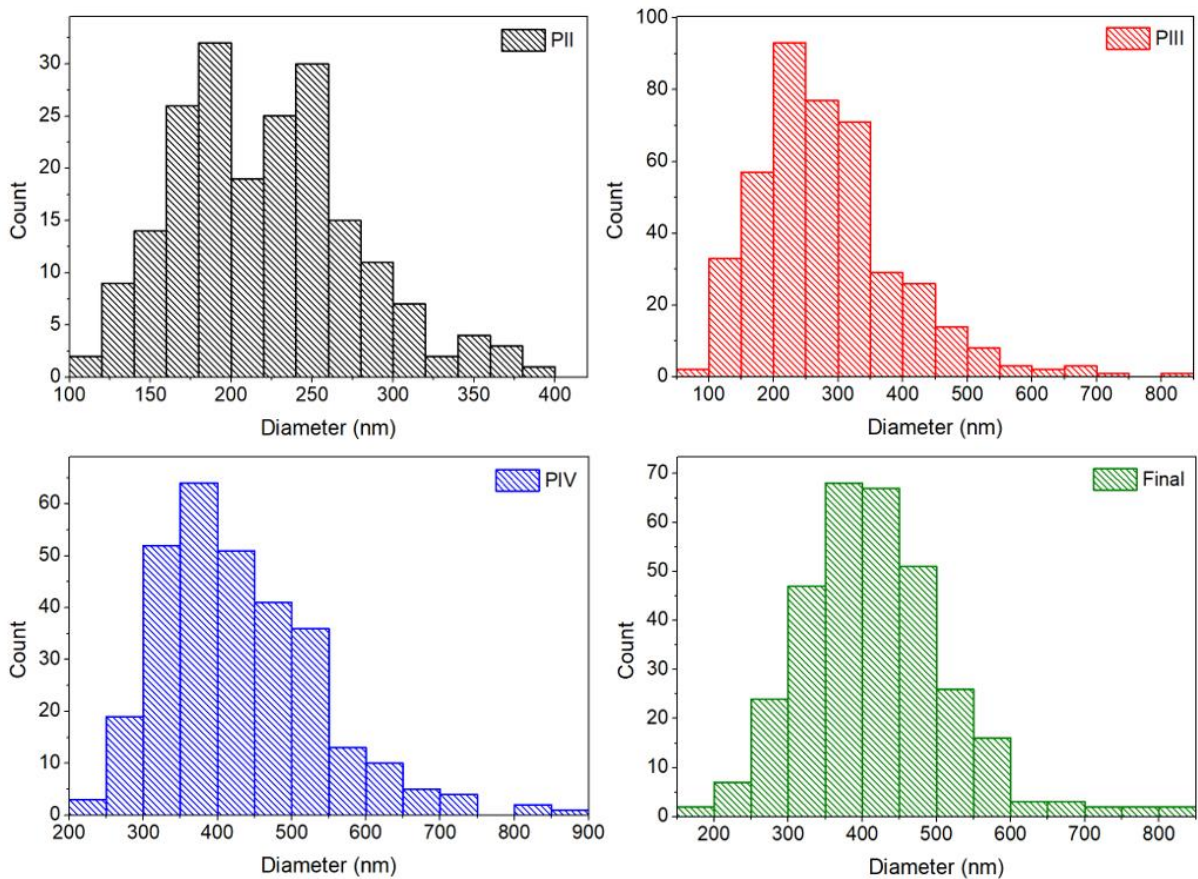

**Fig. S7** Histograms showing the size distribution of the  $Sb_2S_3$  particles across the different reaction stages.

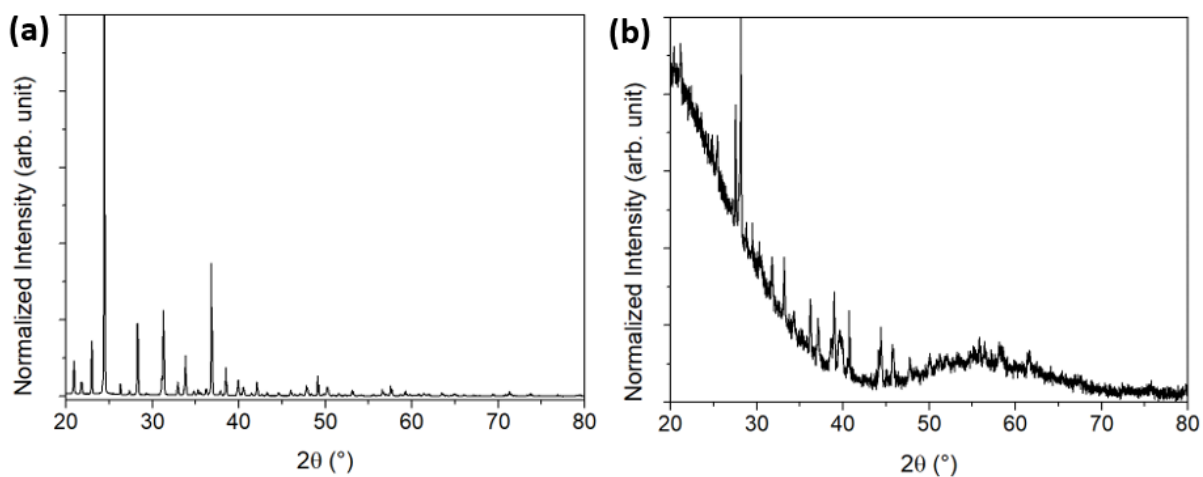

**Fig. S8** Reference X ray diffractograms of (a) L-cysteine and (b)  $SbCl_3$ . The high background signal in (b) is occurring due to the strong hygroscopy of the material.



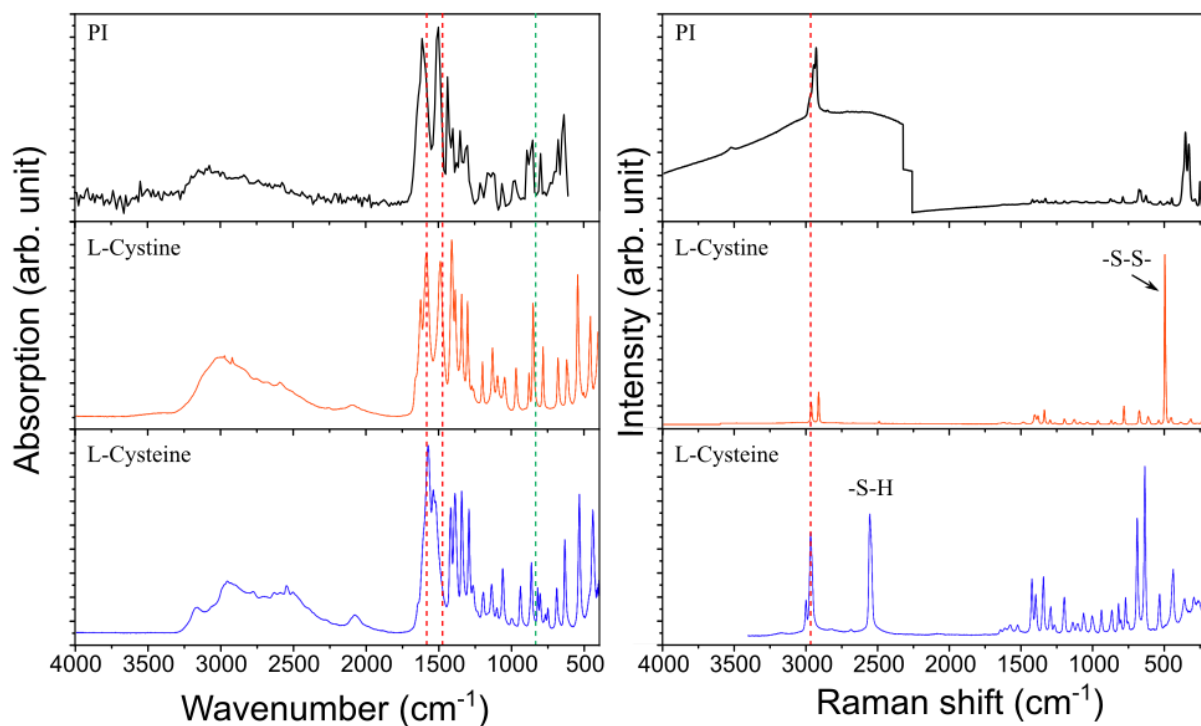

**Fig. S9** FTIR (right) and Raman (left) spectra of the sample PI (140 °C) as well as L-cystine and L-cysteine as a reference.<sup>1</sup> The dotted lines help to localize the peak values.

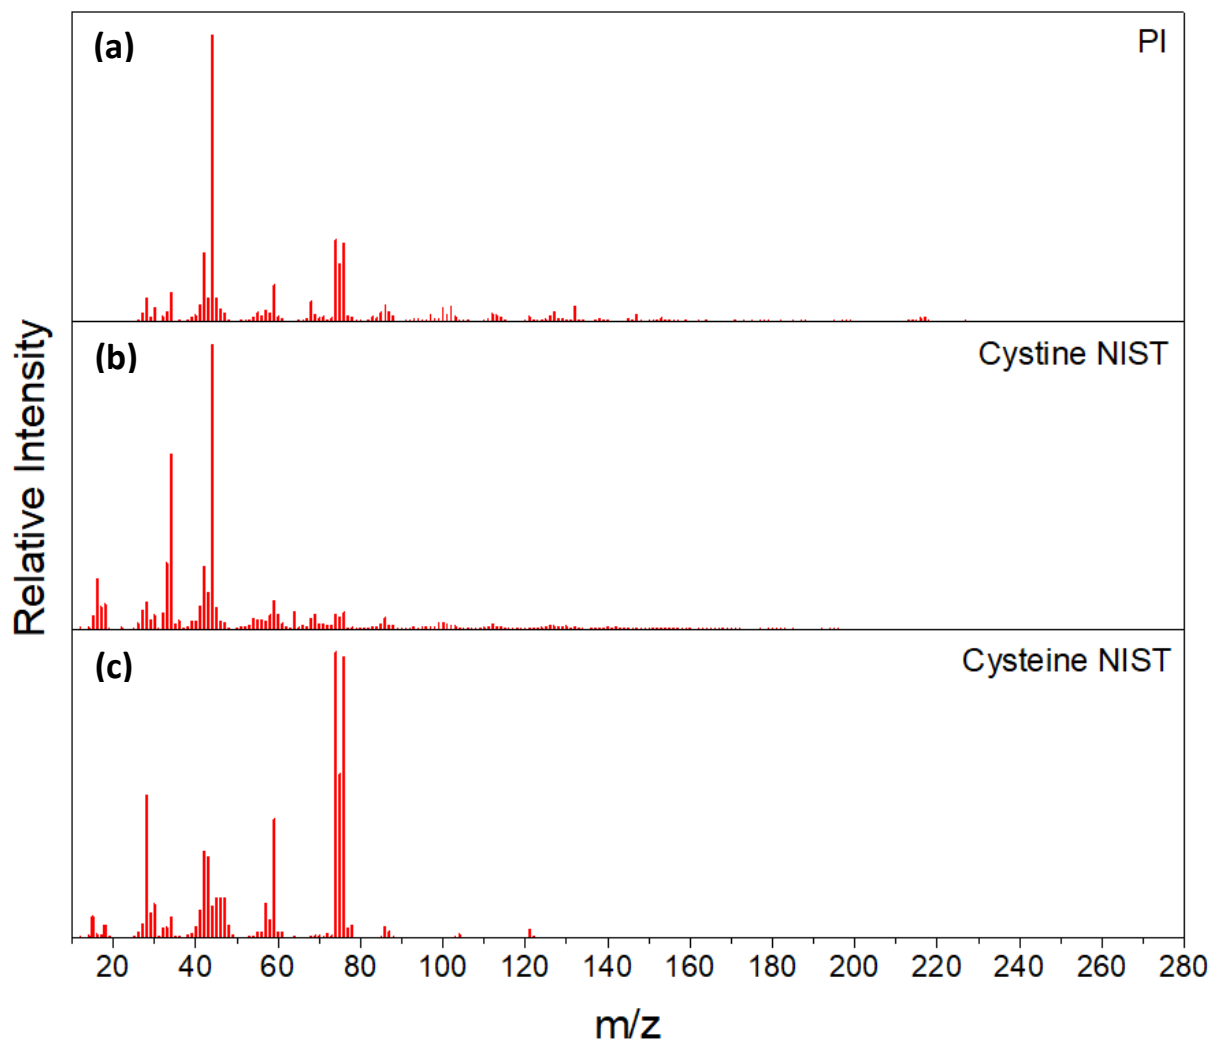

**Fig. S10** EI mass spectrum of the sample PI in comparison with the reference data of cystine and cysteine from the National Institute of Standards and Technology (NIST) database (MS numbers 228153 and 228086, respectively).<sup>2</sup>

#### References

- 1 John Wiley & Sons, Inc. SpectraBase; <https://spectrabase.com/> (retrieved August 14, 2023)
- 2 William E. Wallace, *NIST Mass Spectrometry Data Center, "Mass Spectra" in NIST Chemistry WebBook, NIST Standard Reference Database Number 69*, Eds. P.J. Linstrom and W.G. Mallard, National Institute of Standards and Technology, Gaithersburg MD, 20899, (retrieved August 14, 2023)
